# Supplementary material for: Structural insight into the TRIAP1/PRELI-like domain family of mitochondrial phospholipid transfer complexes
Source: PubMed Central journal article supplement (PMC4515122; doi:10.15252/embr.201540229), 2015-06-13
Supplement: embr0016-0824-sd1.pdf [file embr0016-0824-sd1.pdf]

## Expanded View Figures

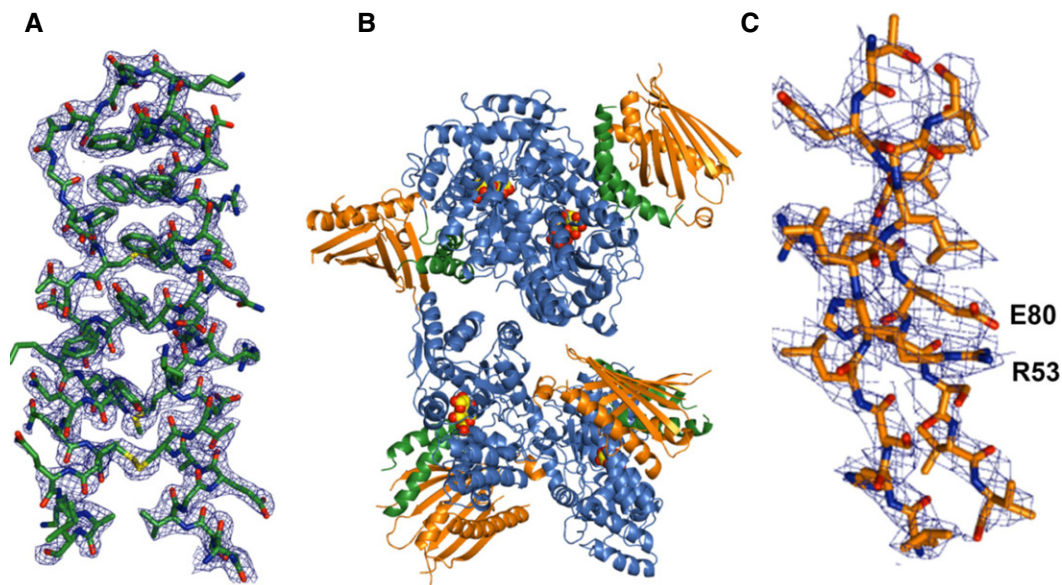

**Figure EV1. Crystal structure of MBP-TRIAP1 and the MBP-TRIAP1-SLMO1 complex.**

A TRIAP1 chain A is shown as sticks with a  $\sigma_A$ -weighted  $2F_o - F_c$  map contoured at 1.0 rms electron density.

B Asymmetric unit showing four complexes of MBP-TRIAP1/SLMO1 bound to maltose. MBP is coloured blue; TRIAP1 is coloured green; SLMO1 coloured orange; and maltose is shown as spheres.

C The  $\beta$ -3 and  $\beta$ -4 strands of SLMO1 chain A are shown as sticks with a  $\sigma_A$ -weighted  $2F_o - F_c$  map contoured at 1.0 rms electron density.

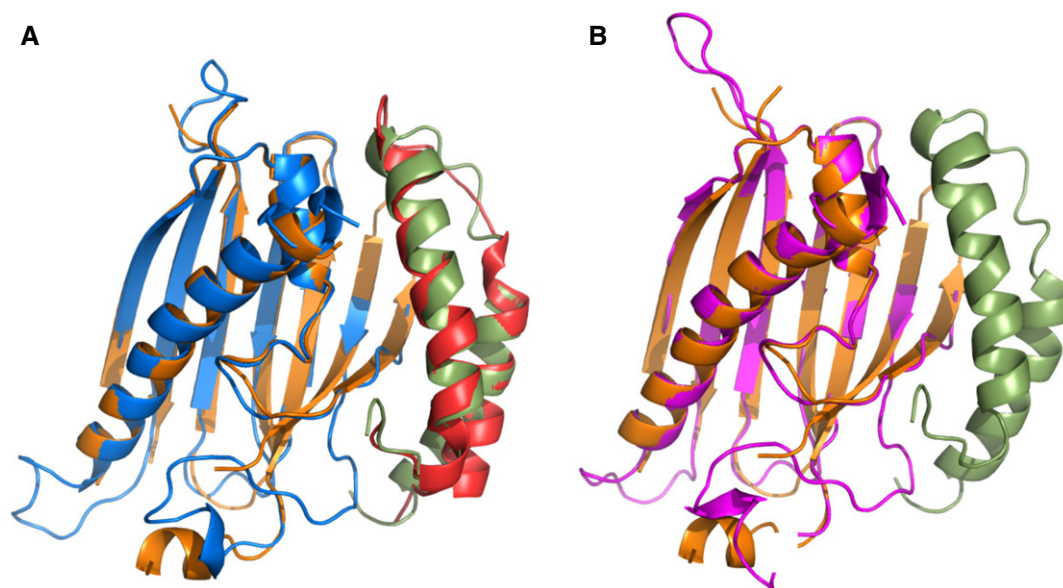

**Figure EV2. Homology-modelled structures for Mdm35-Ups1 and the TRIAP1-PRELID1 complex.**

A Cartoon representation for the modelled structure of the Mdm35-Ups1 complex (red and blue, respectively) superposed on the crystal structure of the TRIAP1-SLMO1 complex (green and orange, respectively).

B Cartoon representation for the modelled structure of TRIAP1-PRELID1 complex (green and magenta, respectively) superposed on the crystal structure of the TRIAP1-SLMO1 complex (green and orange, respectively).

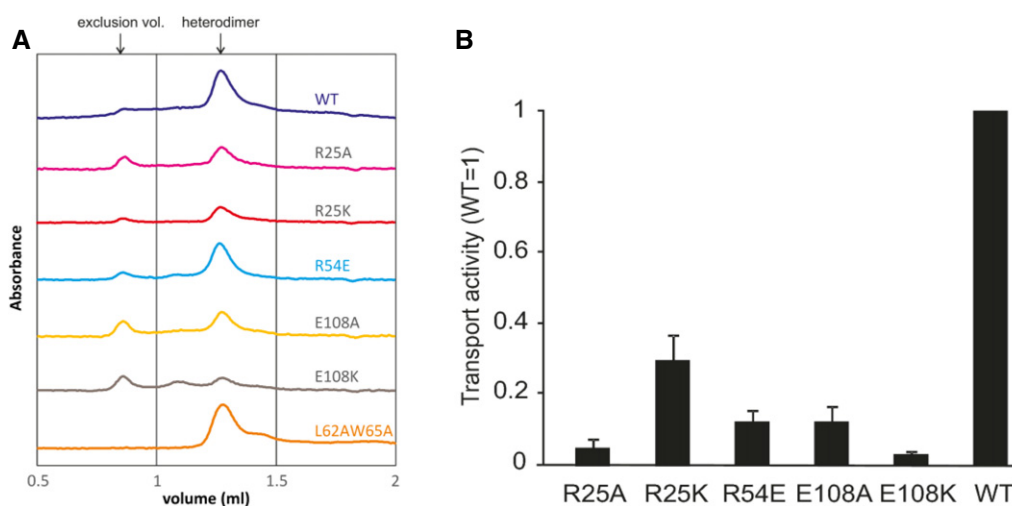

**Figure EV3. Analyses of Mdm35-Ups1 mutants.**

- A Size exclusion profiles of purification of the wild-type Mdm35-Ups1 and mutant complexes. Native complex profile labelled WT and mutants annotated with both residue position and mutation.
- B NBD-PA transfer by Ups1-Mdm35 complexes and their mutant variants *in vitro*. Donor liposomes (12.5  $\mu$ M; DOPC/DOPE/Lac-PE/NBD-PA/Rhod-PE= 50/33/10/5/2%) and acceptor liposomes (50  $\mu$ M; DOPC/DOPE/Lac-PE/DOPA = 50/35/10/5%) were incubated for 5 min with 20 nM (wild-type) or 40 nM mutant complexes and the NBD fluorescence was monitored. Transport activities were represented as per cent of wild-type complexes. Columns and error bars indicate the mean  $\pm$  SD.  $n = 3$ .
